# Supplementary material for: Identification of social relation within pedestrian dyads
Source: PubMed Central journal article supplement (PMC6797107; doi:10.1371/journal.pone.0223656), 2019-10-17
Supplement: pone.0223656.s002.pdf [file pone.0223656.s002.pdf]

## Observable distributions of work-oriented vs leisure-oriented groups

By employing the annotation of the “purpose of visit”, dyads which are “work-oriented” and “leisure-oriented” are identified. Since work-oriented dyads coincide almost perfectly with colleagues, the collection of families, couples, friends are considered to constitute a complementary relation to “work-oriented”, denoted by “leisure-oriented”. In this manner, the four observables compare for “work-oriented” and “leisure-oriented” as given in Figures 1-4. Clearly,  $\delta$  and  $v_g$  turn out to be the most distinguishing observables, even though  $\omega$  and  $\eta$  are also shown to have a statistically significant effect.

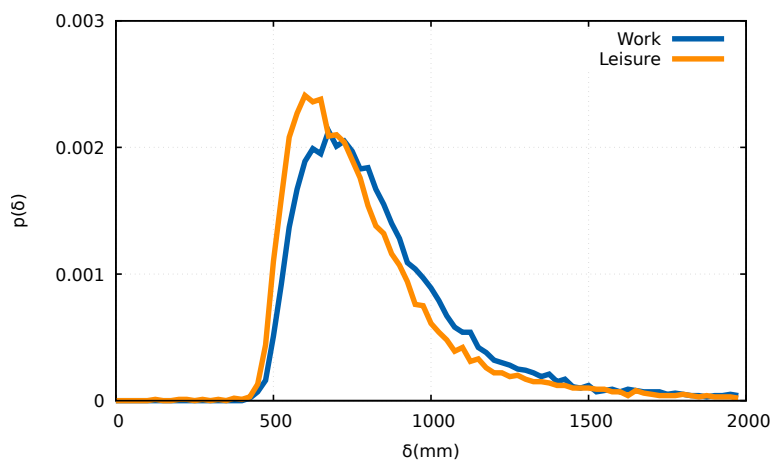

Figure 1: Pdf of  $\delta$  used in hierarchical stage-1.

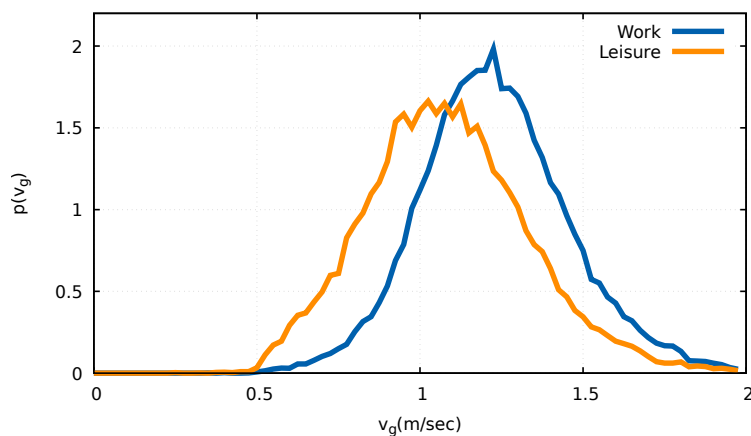

Figure 2: Pdf of  $v_g$  used in hierarchical stage-1.

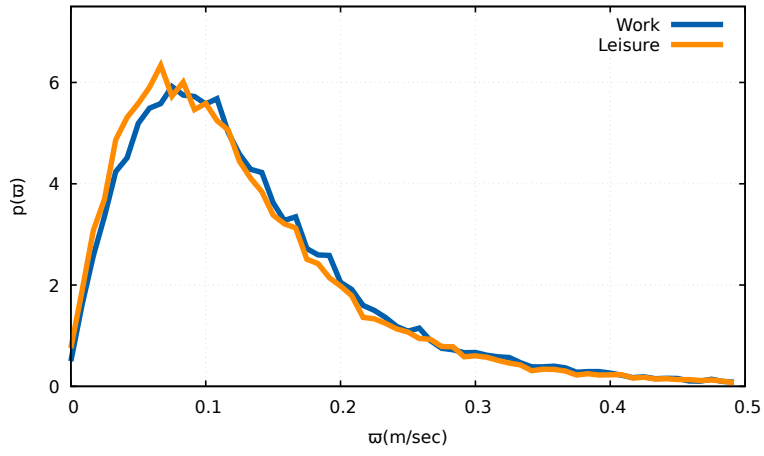

Figure 3: Pdf of  $\omega$  used in hierarchical stage-1.

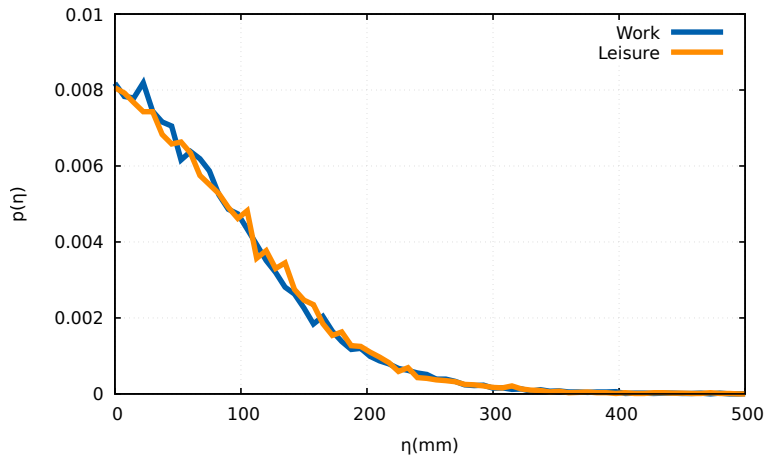

Figure 4: Pdf of  $\eta$  used in hierarchical stage-1.
