# Supplementary material for: Identification of social relation within pedestrian dyads
Source: PubMed Central journal article supplement (PMC6797107; doi:10.1371/journal.pone.0223656), 2019-10-17
Supplement: pone.0223656.s005.pdf [file pone.0223656.s005.pdf]

## Alternative measures

As shown in detail in S3 Appendix<sup>1</sup>, for the 4-D Earth Mover’s distance, we are able, under the assumption of statistical independence of the variables, to provide only an upper bound and not a complete computation. For theoretical completeness, we introduce here two other ways to compute the difference between probability **density** functions for which such a complete computation is possible, namely the Kullback-Leiber and Jensen-Shannon divergences. Despite this theoretical property, these two divergences do not provide results as good as those obtained using the Earth Mover’s Distance.

### Kullback-Leibler divergence

Assuming that  $P$  and  $Q$  are two probability distributions, the KullbackLeibler divergence from  $Q$  to  $P$  is denoted by  $D_{KL}(P\|Q)$  and evaluates the difference between distributions  $P$  and  $Q$  [1].

Although KullbackLeibler divergence is often confused as a way of measuring the *distance* between two probability distributions, it is, mathematically speaking, not a (distance) metric, since it is not symmetric,

$$D_{KL}(P\|Q) \neq D_{KL}(Q\|P),$$

neither does it satisfy the triangular inequality, i.e. it is not in general true that

$$D_{KL}(P\|Q) \leq D_{KL}(P\|R) + D_{KL}(R\|Q),$$

where  $R$  denotes a (third) probability distribution.

However, it is not uncommon to use Kullback-Leibler divergence in machine learning as a way to evaluate the information gain achieved, if  $Q$  is used instead of  $P$ . Explicitly, it is defined as

$$D_{KL}(P\|Q) = \sum_i \left( P(i) \log \left( \frac{P(i)}{Q(i)} \right) \right). \quad (1)$$

An inherent issue with implementations of Kullback-Leibler divergence is related to the empty bins in the probability mass functions. Namely, provided that some values are never observed in the data set, the relating probability values turn out to be 0 due to the empirical approach. While  $P(i) = 0$  does not represent a problem, since  $\lim_{x \rightarrow 0^+} x \log x = 0$  and thus the corresponding terms may be set to 0; terms with  $Q(i) = 0$  are undefined.

Nevertheless, in practice there are several workarounds for such cases. Here, we choose to apply a small offset of  $10^{-10}$  on all values in the empirical pdf. Since the number of observations in our data set is  $\approx 10^4$ , for any  $Q(i) \neq 0$  we have  $Q(i) \gg 10^{-10}$ , and thus adding the offset removes the diverging terms without modifying the distribution  $Q(i)$  in a significant way<sup>2</sup>.

---

<sup>1</sup>Refer to main track for the link.

<sup>2</sup>Obviously, after adding the offset, the distribution  $Q(i)$  is newly normalized in order to preserve  $\sum_i Q(i) = 1$ .

In addition, although Kullback-Leibler divergence is often utilized on univariate random variables, adaptation of Equation 1 to the multivariate case is straightforward, particularly thanks to the independence relation. Namely, as explained in the forthcoming sections, Kullback-Leibler divergence of two probability density functions concerning a multivariate random variable with independent components can be written as the sum of divergences along each dimension.

## Jensen-Shannon divergence

As explained in the previous section, the term in Equation 1 has an asymmetric nature, which disqualifies it from being a *true* metric. In order to evaluate the impact of this asymmetry on performance, we propose contrasting the recognition results obtained using Kullback-Leibler divergence to those obtained employing Jensen-Shannon divergence.

In particular, Jensen-Shannon divergence is based on Kullback-Leibler divergence, but it is symmetric and has always a finite value. Namely, a reference distribution  $M$  is derived from  $P$  and  $Q$  appearing in Equation 1, such that,

$$M(i) = \frac{1}{2}(P(i) + Q(i)). \quad (2)$$

By expressing the divergence of  $P$  and  $Q$  as the sum of their individual (Kullback-Leibler) divergences in relation to the (same) reference distribution in Equation 2, the Jensen-Shannon divergence term  $D_{JS}(P\|Q)$  boils down to,

$$D_{JS}(P\|Q) = \frac{1}{2}D_{KL}(P\|M) + \frac{1}{2}D_{KL}(Q\|M). \quad (3)$$

It may be shown that, provided base 2 is used for the logarithm,  $D_{JS}$  assumes values<sup>3</sup> in  $[0, 1]$ . Furthermore,  $\sqrt{D_{JS}}$  is a proper metric (i.e. it satisfies also the triangular inequality).

Concerning the extension of the univariate case onto multivariate random variables, the proof provided in the next section can be generalized to the Jensen-Shannon divergence. Namely, Jensen-Shannon divergence of two probability density functions concerning a multivariate random variable with independent components can be written as the sum of divergences along each dimension. The details are found in the last section of this document.

## Extending Kullback-Leibler divergence to multivariate space with independent components

Remember that Kullback-Leibler divergence of two discrete probability distributions as  $P$  and  $Q$  is defined in Equation 1 quantifies the divergence “from  $P$  to  $Q$ ”. Without loss

---

<sup>3</sup>The only case, which could lead to a problem in Equation 3, is when a given bin is empty in both distributions (i.e. in both  $P$  and  $Q$ ). However, from a practical point of view, this does not pose a problem for computing the divergence, since it is immanent to disregard the “unobserved” values.

of generality, let us assume that  $\boldsymbol{\alpha}$  is a multivariate random variable, with components  $\alpha_1$  and  $\alpha_2$ ,

$$\boldsymbol{\alpha} = [\alpha_1 \quad \alpha_2]^T.$$

Let us denote the multivariate probability distribution of  $\boldsymbol{\alpha}$  by  $f_{\boldsymbol{\alpha}}$ . Provided that  $\alpha_1$  and  $\alpha_2$  are independent,  $f_{\boldsymbol{\alpha}}$  can be decomposed into the following product,

$$f_{\boldsymbol{\alpha}} = f_{\alpha_1} f_{\alpha_2}.$$

Suppose  $g_{\boldsymbol{\alpha}}$  is another joint probability distribution relating the same random variable  $\boldsymbol{\alpha}$  and is also decomposed as  $g_{\boldsymbol{\alpha}} = g_{\alpha_1} g_{\alpha_2}$ .

According to Equation 1 and under the assumption of independence of  $\alpha_1$  and  $\alpha_2$ , Kullback-Leibler divergence from  $g_{\boldsymbol{\alpha}}$  to  $f_{\boldsymbol{\alpha}}$  can be written as follows,

$$D_{KL}(f_{\boldsymbol{\alpha}} \| g_{\boldsymbol{\alpha}}) = \sum_{\alpha_{1,2}} \left( f_{\alpha_1} f_{\alpha_2} \log \left( \frac{f_{\alpha_1} f_{\alpha_2}}{g_{\alpha_1} g_{\alpha_2}} \right) \right).$$

Here the logarithmic term can be broken down as,

$$D_{KL}(f_{\boldsymbol{\alpha}} \| g_{\boldsymbol{\alpha}}) = \sum_{\alpha_{1,2}} \left( f_{\alpha_1} f_{\alpha_2} \left[ \log \left( \frac{f_{\alpha_1}}{g_{\alpha_1}} \right) + \log \left( \frac{f_{\alpha_2}}{g_{\alpha_2}} \right) \right] \right).$$

The summation terms can be rearranged such that

$$D_{KL}(f_{\boldsymbol{\alpha}} \| g_{\boldsymbol{\alpha}}) = \sum_{\alpha_1} f_{\alpha_1} \sum_{\alpha_2} \left( f_{\alpha_2} \log \left( \frac{f_{\alpha_2}}{g_{\alpha_2}} \right) \right) + \sum_{\alpha_2} f_{\alpha_2} \sum_{\alpha_1} \left( f_{\alpha_1} \log \left( \frac{f_{\alpha_1}}{g_{\alpha_1}} \right) \right).$$

Here the inner summation terms can be identified as Kullback-Leibler divergences on univariate random variables  $\alpha_2$  and  $\alpha_1$ , respectively,

$$D_{KL}(f_{\boldsymbol{\alpha}} \| g_{\boldsymbol{\alpha}}) = \sum_{\alpha_1} f_{\alpha_1} D_{KL}(f_{\alpha_2} \| g_{\alpha_2}) + \sum_{\alpha_2} f_{\alpha_2} D_{KL}(f_{\alpha_1} \| g_{\alpha_1}).$$

By moving these divergence terms out of summation, we obtain,

$$D_{KL}(f_{\boldsymbol{\alpha}} \| g_{\boldsymbol{\alpha}}) = D_{KL}(f_{\alpha_2} \| g_{\alpha_2}) \sum_{\alpha_1} f_{\alpha_1} + D_{KL}(f_{\alpha_1} \| g_{\alpha_1}) \sum_{\alpha_2} f_{\alpha_2}.$$

Note that the terms  $\sum_{\alpha_1} f_{\alpha_1}$  and  $\sum_{\alpha_2} f_{\alpha_2}$  are the integrals of the pdfs and thus integrate to 1. Therefore, they can simply be omitted,

$$D_{KL}(f_{\boldsymbol{\alpha}} \| g_{\boldsymbol{\alpha}}) = D_{KL}(f_{\alpha_2} \| g_{\alpha_2}) + D_{KL}(f_{\alpha_1} \| g_{\alpha_1}).$$

This result can be generalized to any number of dimensions of  $\boldsymbol{\alpha}$

$$\boldsymbol{\alpha} = [\alpha_1 \quad \alpha_2 \quad \dots \quad \alpha_n]^T,$$

as follows,

$$D_{KL}(f_{\boldsymbol{\alpha}} \| g_{\boldsymbol{\alpha}}) = \sum_{i=1}^n D_{KL}(f_{\alpha_i} \| g_{\alpha_i}).$$

Thus, Kullback-Leibler divergence of two probability density functions concerning a multivariate random variable with independent components can be written as the sum of divergences along each dimension.

## Extending Jensen-Shannon divergence to multivariate space with independent components

The proof provided in the previous section could be immediately extended to  $D_{JS}$  if the reference distribution

$$h_{\alpha} = \frac{1}{2} (f_{\alpha} + g_{\alpha}), \quad (4)$$

had independent variables. Nevertheless, following the notation of previous section, we see that

$$h_{\alpha} = \frac{1}{2} (f_{\alpha_1} f_{\alpha_2} + g_{\alpha_1} g_{\alpha_2}), \quad (5)$$

cannot in general be factorized. The solution is to define the  $D_{JS}$  for multivariate space with independent components with respect to a factorized reference distribution,

$$h_{\alpha}^f = \frac{1}{4} (f_{\alpha_1} + g_{\alpha_1}) (f_{\alpha_2} + g_{\alpha_2}). \quad (6)$$

Using this definition, we still have a divergence with the same properties as  $D_{JS}$ , for which the divergence of two probability density functions concerning a multivariate random variable with independent components can be written as the sum of divergences along each dimension.

## Results relating alternative measures

We see that both using Kullback-Leibler divergence and Jensen-Shannon divergence acceptable recognition rates are obtained only at stage-1 of hierarchical recognition.

### Hierarchical stage-1

#### Results of Kullback-Leibler divergence for stage-1 of hierarchical recognition

Table 1: Kullback-Leibler divergence, hierarchical stage-1,  $\alpha = 1$  (in %).

|              |         | Work         | Leisure      |
|--------------|---------|--------------|--------------|
| Ground truth | Work    | <b>81.30</b> | 18.70        |
|              | Leisure | 41.94        | <b>58.06</b> |

Table 2: Kullback-Leibler divergence, hierarchical stage-1,  $\alpha = 1$  (in %) with detailed confusion rates.

|              |            | Work         | Leisure      |
|--------------|------------|--------------|--------------|
| Ground truth | Colleagues | <b>81.30</b> | 18.70        |
|              | Families   | 35.14        | <b>64.86</b> |
|              | Couples    | 35.34        | <b>64.66</b> |
|              | Friends    | 49.04        | <b>50.96</b> |

#### Results of Jensen-Shannon divergence for stage-1 of hierarchical recognition

Table 3: Jensen-Shannon divergence, hierarchical stage-1,  $\alpha = 1$  (in %).

|              |         | Work         | Leisure      |
|--------------|---------|--------------|--------------|
| Ground truth | Work    | <b>78.72</b> | 21.28        |
|              | Leisure | 39.57        | <b>60.43</b> |

Table 4: Jensen-Shannon divergence, hierarchical stage-1,  $\alpha = 1$  (in %) with detailed confusion rates.

|              |            | Work         | Leisure      |
|--------------|------------|--------------|--------------|
| Ground truth | Colleagues | <b>78.72</b> | 21.28        |
|              | Families   | 35.80        | <b>64.20</b> |
|              | Couples    | 30.11        | <b>69.89</b> |
|              | Friends    | 45.32        | <b>54.68</b> |

## Hierarchical stage-2

### Results of Kullback-Leibler divergence for stage-2 of hierarchical recognition

Table 5: Kullback-Leibler divergence, hierarchical stage-2,  $\alpha = 1$  (in %).

|              |          | Families | Couples      | Friends |
|--------------|----------|----------|--------------|---------|
| Ground truth | Families | 12.81    | <b>67.76</b> | 19.43   |
|              | Couples  | 5.09     | <b>80.63</b> | 14.29   |
|              | Friends  | 6.75     | <b>73.16</b> | 20.10   |

### Results of Jensen-Shannon divergence for stage-2 of hierarchical recognition

Table 6: Jensen-Shannon divergence, hierarchical stage-2,  $\alpha = 1$  (in %).

|              |          | Families | Couples      | Friends |
|--------------|----------|----------|--------------|---------|
| Ground truth | Families | 33.54    | <b>34.93</b> | 31.52   |
|              | Couples  | 18.46    | <b>52.63</b> | 28.91   |
|              | Friends  | 21.55    | <b>40.28</b> | 38.17   |

## Non-Hierarchical

### Results of Kullback-Leibler divergence for non-hierarchical recognition

Table 7: Kullback-Leibler divergence, non-hierarchical,  $\alpha = 1$  (in %).

|              |            | Colleagues   | Families | Couples      | Friends |
|--------------|------------|--------------|----------|--------------|---------|
| Ground truth | Colleagues | <b>70.45</b> | 1.96     | 24.33        | 3.25    |
|              | Families   | 27.28        | 13.99    | <b>50.81</b> | 7.92    |
|              | Couples    | 24.69        | 6.66     | <b>61.60</b> | 7.06    |
|              | Friends    | 37.21        | 7.70     | <b>49.68</b> | 5.41    |

### Results of Jensen-Shannon divergence for non-hierarchical recognition

Table 8: Jensen-Shannon divergence divergence, non-hierarchical,  $\alpha = 1$  (in %).

|              |            | Colleagues   | Families | Couples      | Friends |
|--------------|------------|--------------|----------|--------------|---------|
| Ground truth | Colleagues | <b>76.53</b> | 6.26     | 12.37        | 4.83    |
|              | Families   | <b>32.19</b> | 30.28    | 30.28        | 7.26    |
|              | Couples    | 28.14        | 17.29    | <b>44.74</b> | 9.83    |
|              | Friends    | <b>40.66</b> | 20.26    | 31.00        | 8.08    |

## References

- [1] S. Kullback and R. A. Leibler, “On information and sufficiency,” *The Annals of Mathematical Statistics*, vol. 22, no. 1, pp. 79–86, 1951.
